# Supplementary material for: OTUB1 promotes osteoblastic bone formation through stabilizing FGFR2
Source: PubMed Central journal article supplement (PMC10079838; doi:10.1038/s41392-023-01354-2), 2023-04-07

# Source data Fig. 3

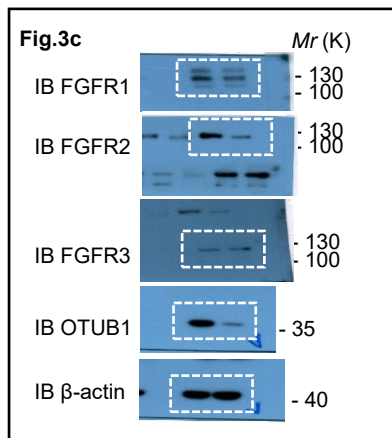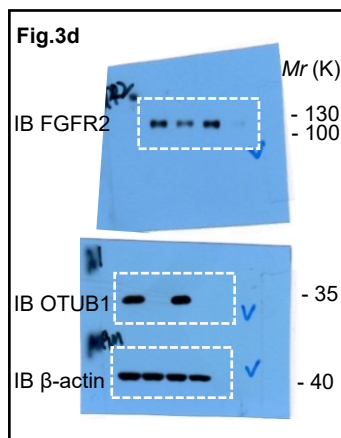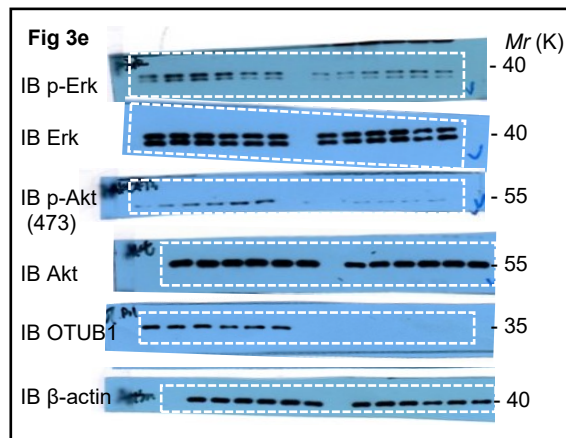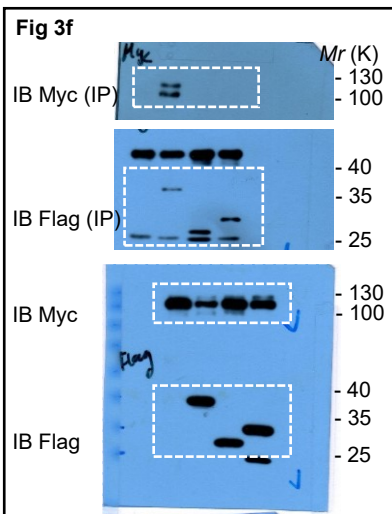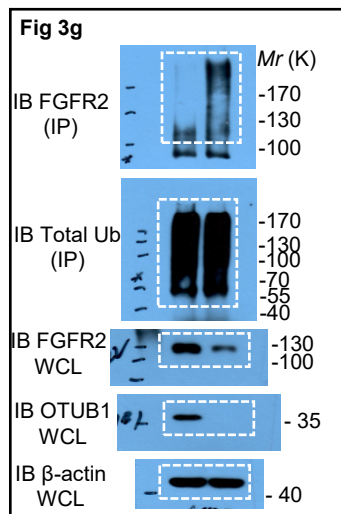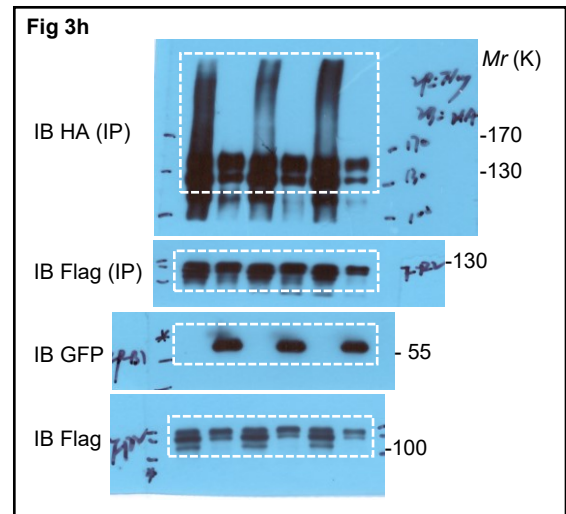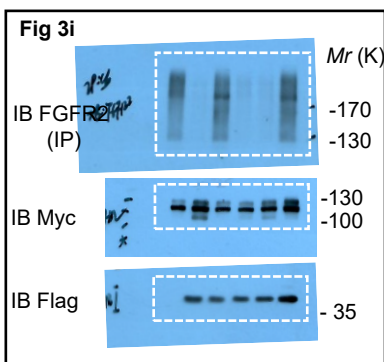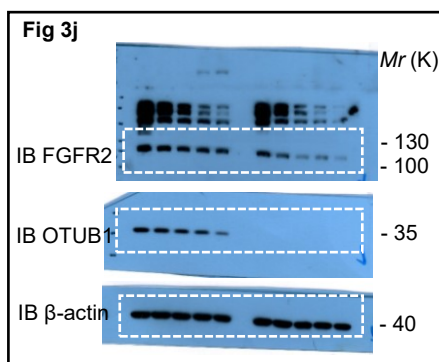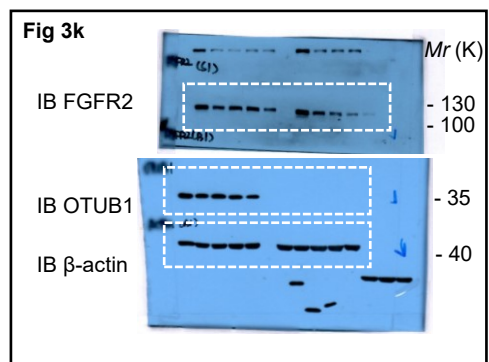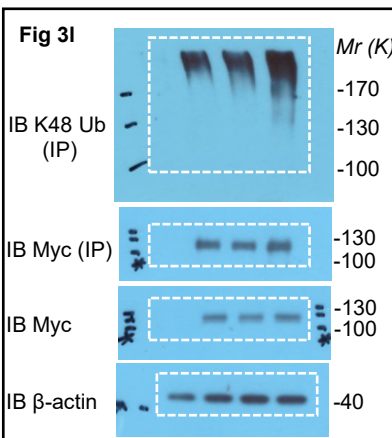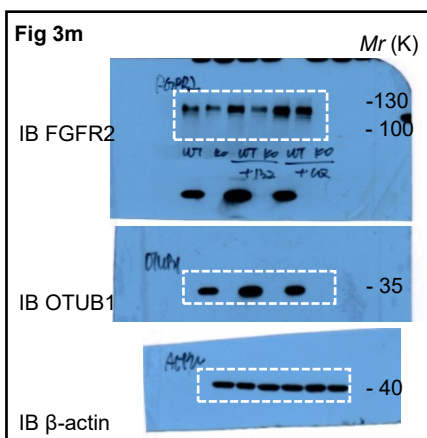

# Source data Fig. 4

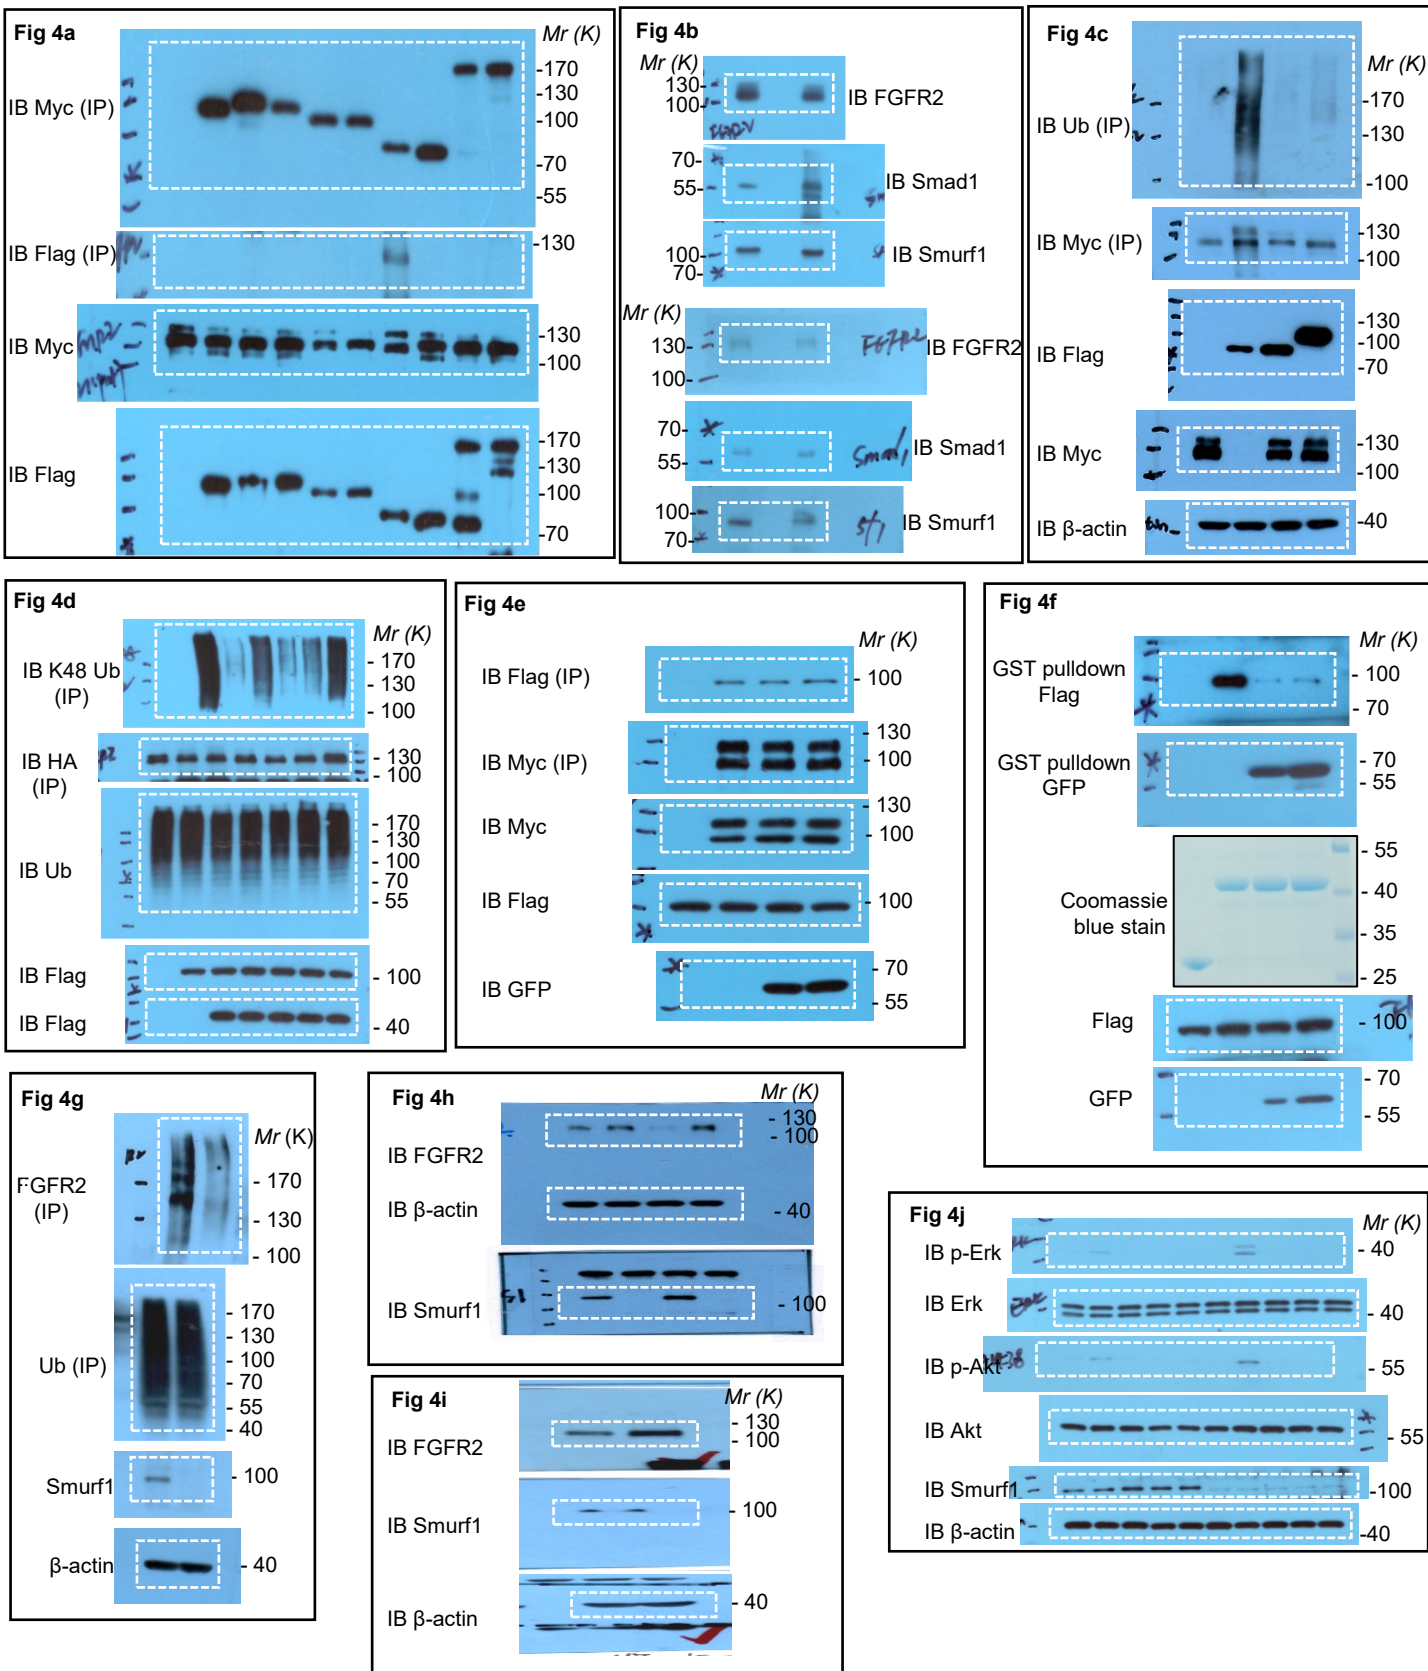

Source data Fig. S1 - S5

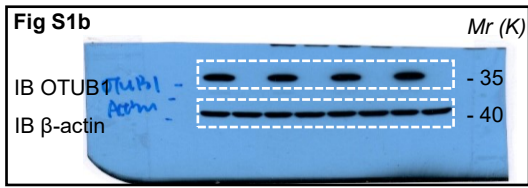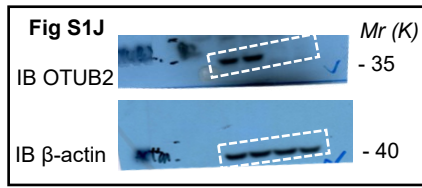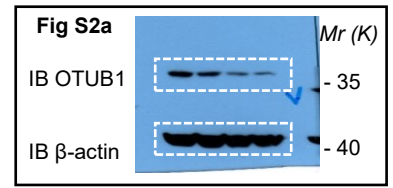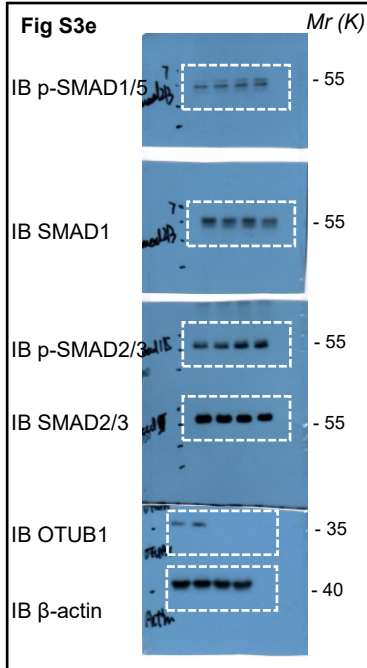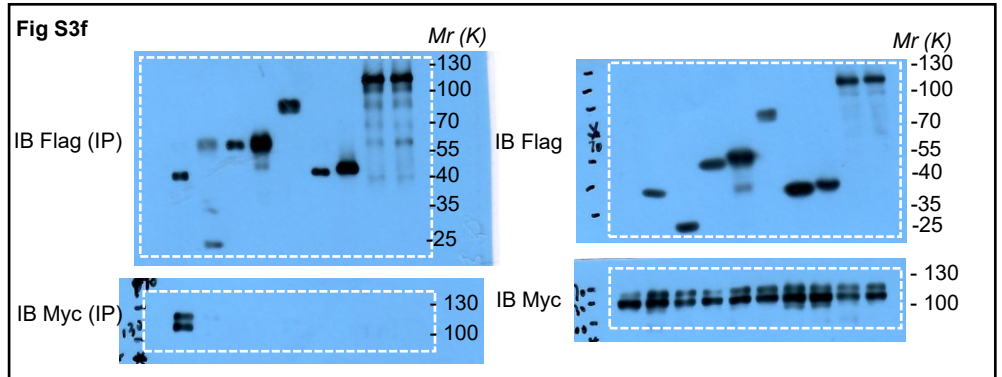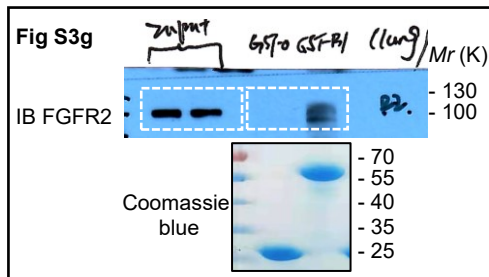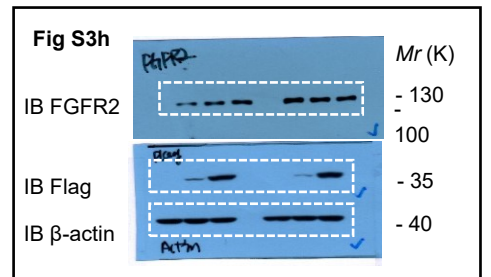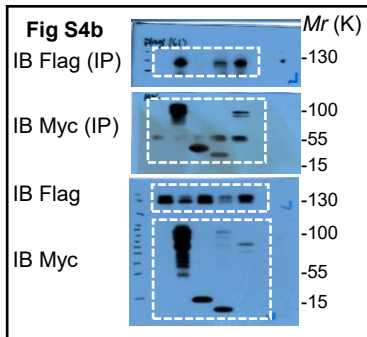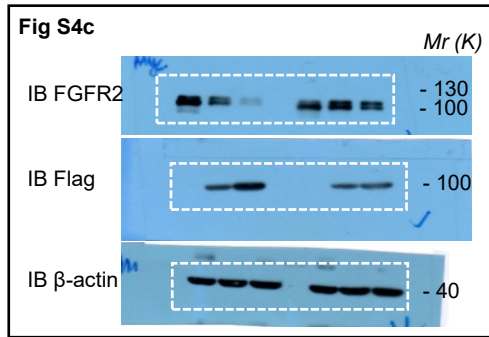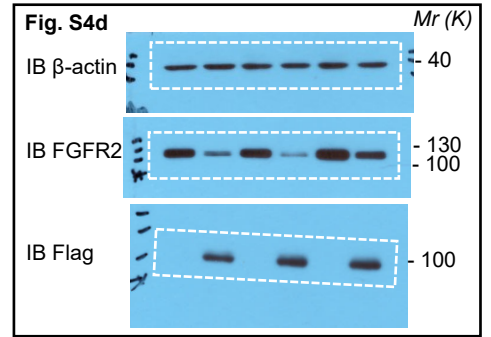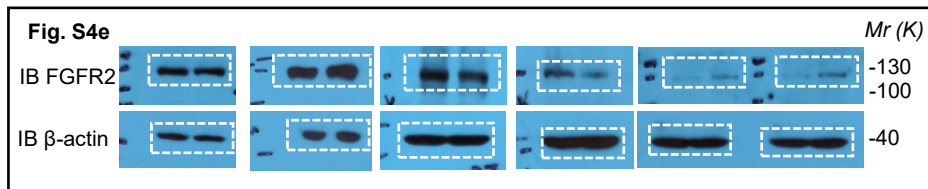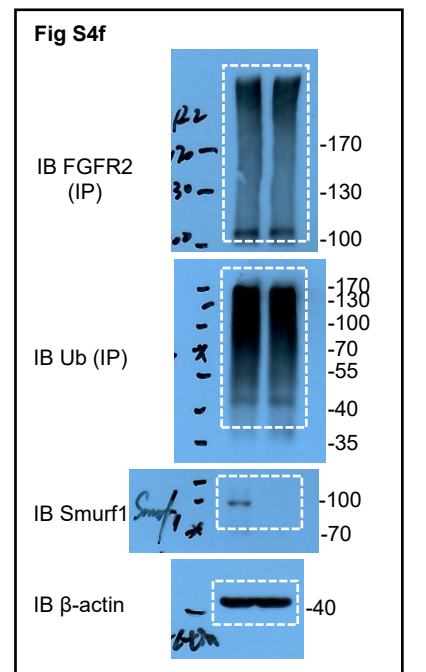

Supplement: 41392_2023_1354_MOESM2_ESM.pdf [file 41392_2023_1354_MOESM2_ESM.pdf]
